# Supplementary material for: Inflammatory infiltration into placentas of Neospora caninum challenged cattle correlates with clinical outcome of pregnancy
Source: PubMed Central journal article supplement (PMC3922085; doi:10.1186/1297-9716-45-11), 2014-01-31

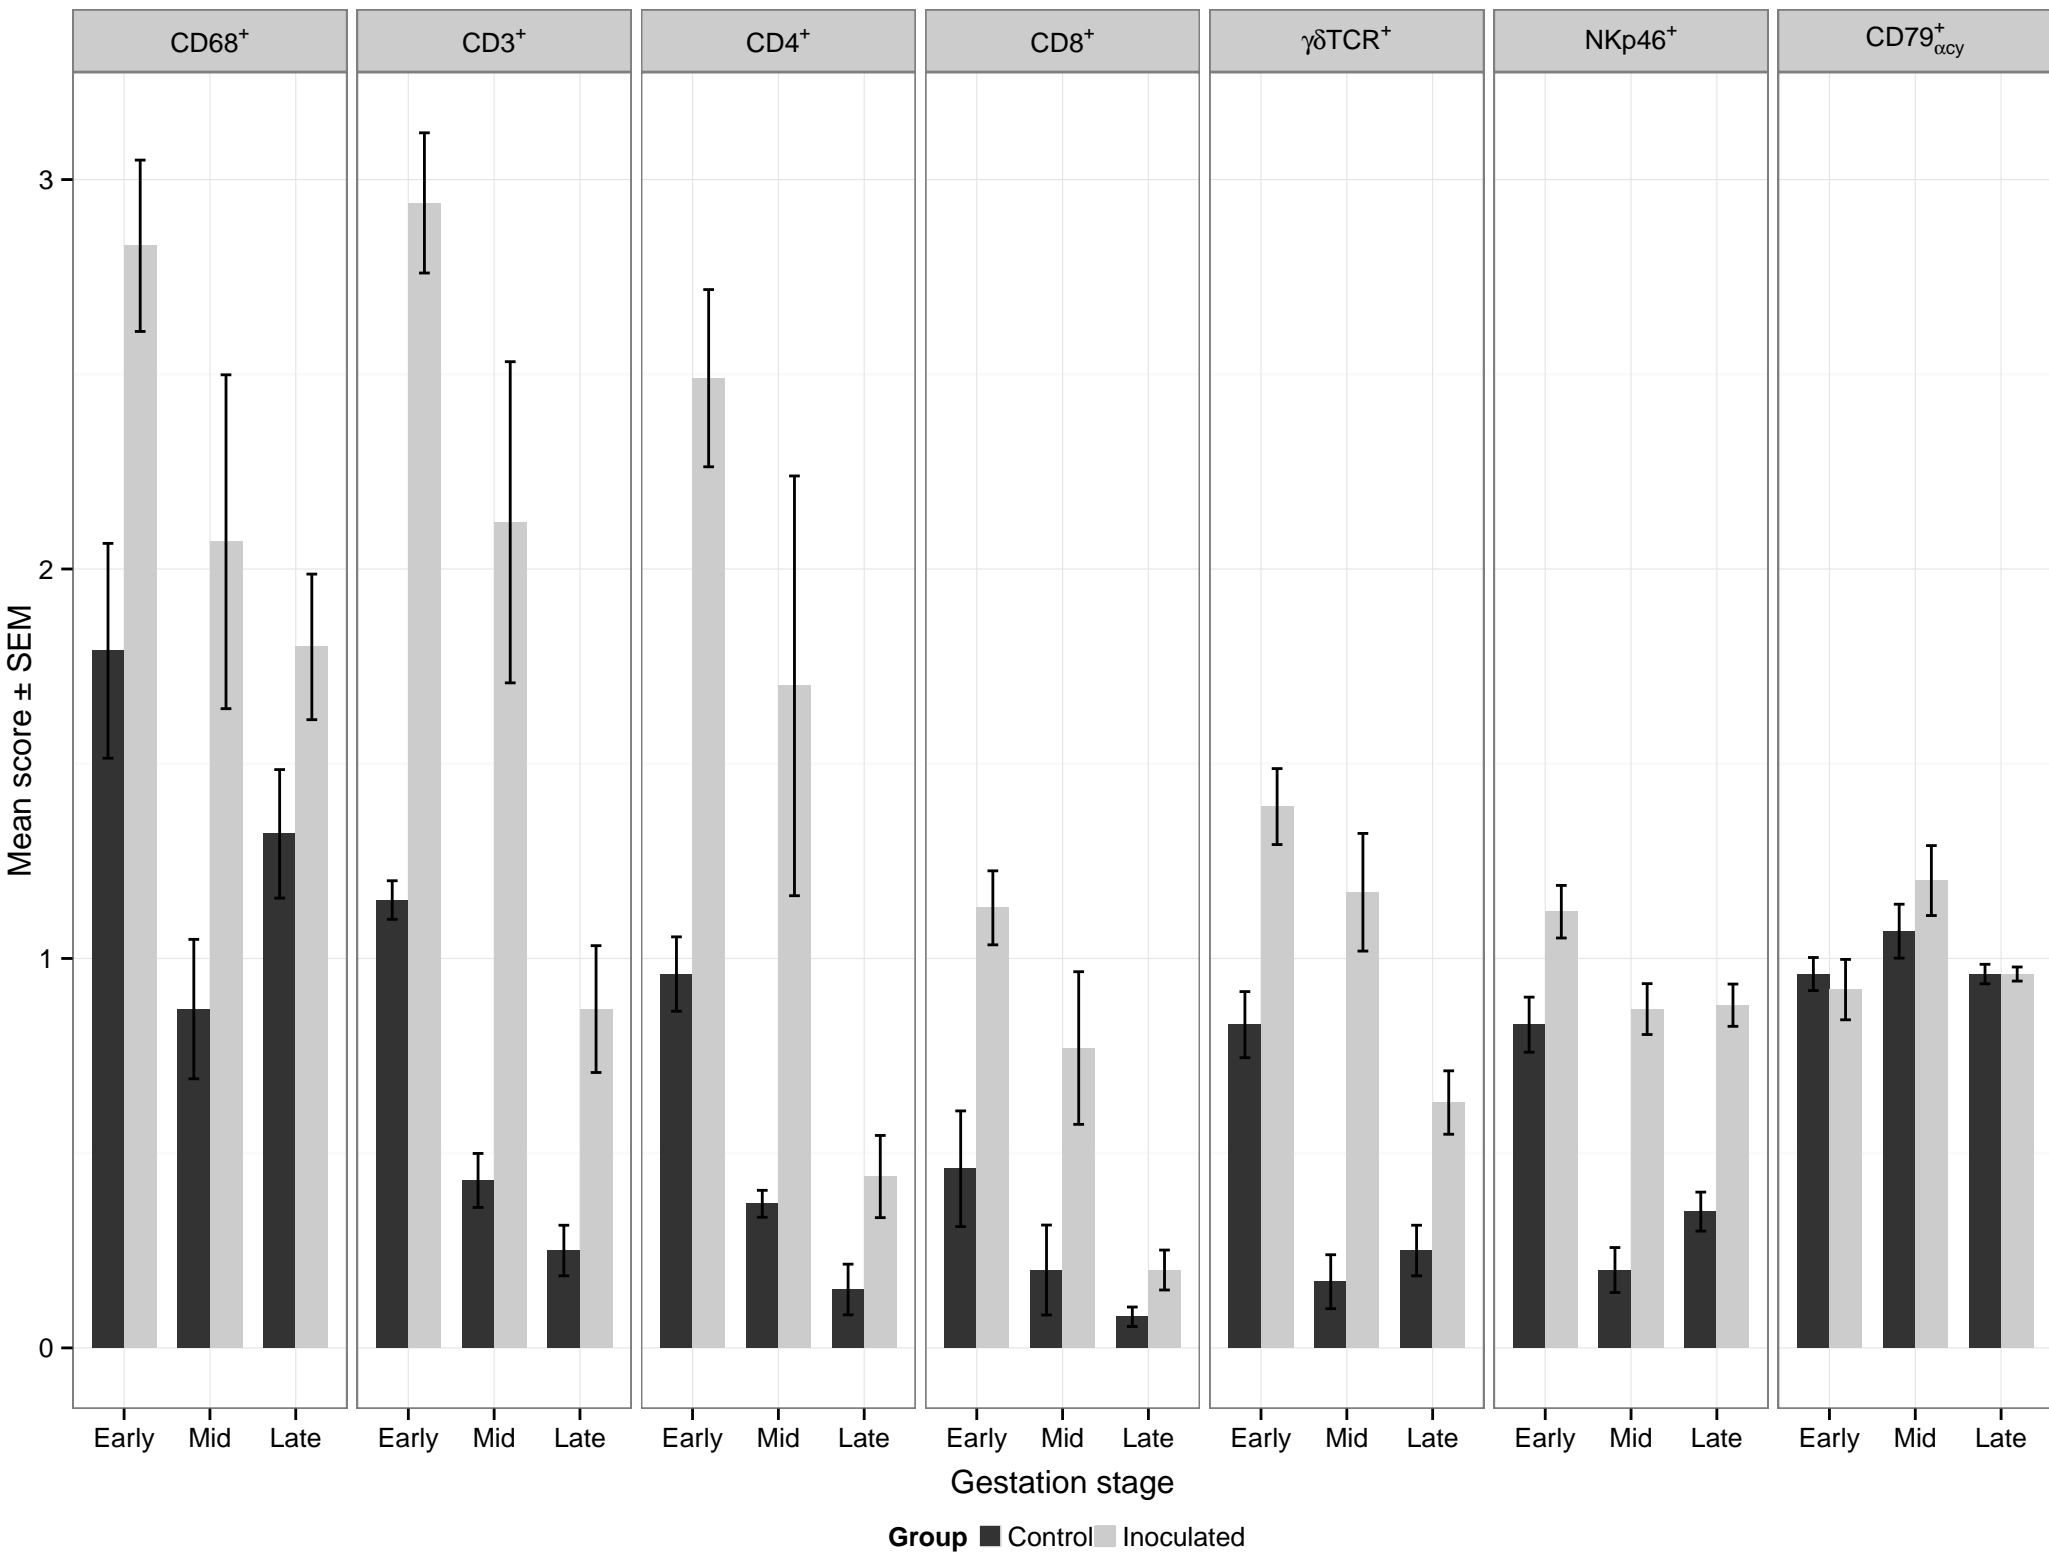

Supplement: 1297-9716-45-11-S3.pdf [file 1297-9716-45-11-S3.pdf]
